# Supplementary material for: Understanding the Molecular Bases of the Endophytic/Pathogenic Behavior of Fusarium Oxysporum Interacting With Vanilla Planifolia
Source: Preprints.org preprint supplement (doi:10.20944/preprints202106.0214.v1), 2021-06-08
Supplement: Supplementary file 4 [file Table 1.xlsx]

## Sheet: Hoja1
Dataset to filter	Gene accounts	Data to contrast	Gene accounts	Generated dataset	Gene accounts	Number of genes filtered
Green	6174	Yellow	5455	Genes involved in infection at 2 days	3045	3129
Red	13092	Blue	5765	Genes involved in infection at 10 days	7734	5358
Genes involved in infection at 2 days	3045	Genes involved in infection at 10 days	7734	Unique genes of early infection	1334	1711
Genes involved in infection at 10 days	7734	Genes involved in infection at 2 days	3045	Unique genes of late infection	6023	1711
