# Supplementary material for: Understanding the Molecular Bases of the Endophytic/Pathogenic Behavior of Fusarium Oxysporum Interacting With Vanilla Planifolia
Source: Preprints.org preprint supplement (doi:10.20944/preprints202106.0214.v1), 2021-06-08
Supplement: Supplementary file 5 [file Table 10.xlsx]

## Sheet: Hoja1
Gene ID	Coding protein	Fusarium species
FOXG_09823	Fusaric acid resistance protein-like	F. oxysporum f. sp. vanillae
FOXG_08869	Fusaric acid resistance protein-like	F. oxysporum f. sp. vanillae
FOXG_16912	Fusaric acid resistance protein-like	F. oxysporum f. sp. vanillae
FOXG_08593	Fusaric acid resistance protein-like	F. oxysporum f. sp. vanillae
FOXG_06206	Fusaric acid resistance protein-like	F. oxysporum f. sp. vanillae
FOXG_05525	Fusaric acid resistance protein-like	F. oxysporum f. sp. vanillae
FOXG_09319	Fusarinine C esterase SidJ	F. oxysporum f. sp. vanillae
