# Supplementary material for: Understanding the Molecular Bases of the Endophytic/Pathogenic Behavior of Fusarium Oxysporum Interacting With Vanilla Planifolia
Source: Preprints.org preprint supplement (doi:10.20944/preprints202106.0214.v1), 2021-06-08
Supplement: Supplementary file 6 [file Table 2.xlsx]

## Sheet: Hoja1
Category	Gene Count
Early stage infection	3045
Late stage infection	7734
Exclusive of early stage infection	1334
Exclusive of late stage infection	6023
