# Supplementary material for: Understanding the Molecular Bases of the Endophytic/Pathogenic Behavior of Fusarium Oxysporum Interacting With Vanilla Planifolia
Source: Preprints.org preprint supplement (doi:10.20944/preprints202106.0214.v1), 2021-06-08
Supplement: Supplementary file 7 [file Table 3.xlsx]

## Sheet: Hoja1
Gene ID	Coding protein	Fusarium species
FOXG_15434	Pectin lyase fold/virulence factor	F. oxysporum f. sp. vanillae
FOXG_05948	Pectin lyase fold/virulence factor	F. oxysporum f. sp. vanillae
FOXG_09893	Pectin lyase fold/virulence factor	F. oxysporum f. sp. vanillae
FOXG_09744	Pectin lyase fold/virulence factor	F. oxysporum f. sp. vanillae
FOXG_13795	Pectin lyase fold/virulence factor	F. oxysporum f. sp. vanillae
FOXG_08862	Pectin lyase fold/virulence factor	F. oxysporum f. sp. vanillae
FOXG_12264	Pectin lyase fold/virulence factor	F. oxysporum f. sp. vanillae
FOXG_02513	Pectin lyase fold/virulence factor	F. oxysporum f. sp. vanillae
FOXG_13794	Pectin lyase fold/virulence factor	F. oxysporum f. sp. vanillae
FOXG_04765	Pectin lyase fold/virulence factor	F. oxysporum f. sp. vanillae
FOXG_11739	Pectin lyase fold/virulence factor	F. oxysporum f. sp. vanillae
FOXG_14695	Pectin lyase fold/virulence factor	F. oxysporum f. sp. vanillae
FOXG_13051	Pectin lyase fold/virulence factor	F. oxysporum f. sp. vanillae
FOXG_12330	Pectin lyase fold/virulence factor	F. oxysporum f. sp. vanillae
FOXG_12863	Hypervirulence associated protein, TUDOR domain	F. oxysporum f. sp. vanillae
FOXG_15415	Pectin lyase fold/virulence factor	F. oxysporum f. sp. vanillae
FOXG_09894	Pectin lyase fold/virulence factor	F. oxysporum f. sp. vanillae
