# Supplementary material for: Understanding the Molecular Bases of the Endophytic/Pathogenic Behavior of Fusarium Oxysporum Interacting With Vanilla Planifolia
Source: Preprints.org preprint supplement (doi:10.20944/preprints202106.0214.v1), 2021-06-08
Supplement: Supplementary file 8 [file Table 4.xlsx]

## Sheet: Hoja1
Gene ID	Coding protein	Fusarium species
FOXG_17741	Pectin lyase fold/virulence factor	F. oxysporum f. sp. vanillae
FOXG_15434	Pectin lyase fold/virulence factor	F. oxysporum f. sp. vanillae
FOXG_05948	Pectin lyase fold/virulence factor	F. oxysporum f. sp. vanillae
FOXG_05861	Egh16-like virulence factor	F. oxysporum f. sp. vanillae
FOXG_13331	Pectin lyase fold/virulence factor	F. oxysporum f. sp. vanillae
FOXG_09893	Pectin lyase fold/virulence factor	F. oxysporum f. sp. vanillae
FOXG_11096	Pectin lyase fold/virulence factor	F. oxysporum f. sp. vanillae
FOXG_13795	Pectin lyase fold/virulence factor	F. oxysporum f. sp. vanillae
FOXG_08862	Pectin lyase fold/virulence factor	F. oxysporum f. sp. vanillae
FOXG_12264	Pectin lyase fold/virulence factor	F. oxysporum f. sp. vanillae
FOXG_02509	Pectin lyase fold/virulence factor	F. oxysporum f. sp. vanillae
FOXG_13794	Pectin lyase fold/virulence factor	F. oxysporum f. sp. vanillae
FOXG_11739	Pectin lyase fold/virulence factor	F. oxysporum f. sp. vanillae
FOXG_05407	Pectin lyase fold/virulence factor	F. oxysporum f. sp. vanillae
FOXG_16516	Pectin lyase fold/virulence factor	F. oxysporum f. sp. vanillae
FOXG_13051	Pectin lyase fold/virulence factor	F. oxysporum f. sp. vanillae
FOXG_13801	Pectin lyase fold/virulence factor	F. oxysporum f. sp. vanillae
FOXG_06038	Pectin lyase fold/virulence factor	F. oxysporum f. sp. vanillae
FOXG_12863	Hypervirulence associated protein, TUDOR domain	F. oxysporum f. sp. vanillae
FOXG_10052	Pectin lyase fold/virulence factor	F. oxysporum f. sp. vanillae
FOXG_15415	Pectin lyase fold/virulence factor	F. oxysporum f. sp. vanillae
FOXG_11740	Pectin lyase fold/virulence factor	F. oxysporum f. sp. vanillae
FOXG_14660	Pectin lyase fold/virulence factor	F. oxysporum f. sp. vanillae
FOXG_13103	Pectin lyase fold/virulence factor	F. oxysporum f. sp. vanillae
FOXG_09744	Pectin lyase fold/virulence factor	F. oxysporum f. sp. vanillae
FOXG_02712	Egh16-like virulence factor	F. oxysporum f. sp. vanillae
FOXG_02513	Pectin lyase fold/virulence factor	F. oxysporum f. sp. vanillae
FOXG_16409	Pectin lyase fold/virulence factor	F. oxysporum f. sp. vanillae
FOXG_14695	Pectin lyase fold/virulence factor	F. oxysporum f. sp. vanillae
FOXG_10728	Pectin lyase fold/virulence factor	F. oxysporum f. sp. vanillae
FOXG_12330	Pectin lyase fold/virulence factor	F. oxysporum f. sp. vanillae
FOXG_10062	Pectin lyase fold/virulence factor	F. oxysporum f. sp. vanillae
FOXG_17000	Pectin lyase fold/virulence factor	F. oxysporum f. sp. vanillae
FOXG_10173	Egh16-like virulence factor	F. oxysporum f. sp. vanillae
