# Supplementary material for: Understanding the Molecular Bases of the Endophytic/Pathogenic Behavior of Fusarium Oxysporum Interacting With Vanilla Planifolia
Source: Preprints.org preprint supplement (doi:10.20944/preprints202106.0214.v1), 2021-06-08
Supplement: Supplementary file 13 [file Table 9.xlsx]

## Sheet: Hoja1
Gene ID	Coding protein	Fusarium species
FOXG_06413	Pathogen effector; putative necrosis-inducing factor	F. oxysporum f. sp. vanillae
FOXG_09418	Clp amino terminal domain, pathogenicity island component	F. oxysporum f. sp. vanillae
FOXG_17014	Necrosis inducing protein (NPP1)	F. oxysporum f. sp. vanillae
FOXG_07723	Necrosis inducing protein (NPP1)	F. oxysporum f. sp. vanillae
